# Supplementary material for: The Effect of the BCO2 Genotype on the Expression of Genes Related to Carotenoid, Retinol, and α-Tocopherol Metabolism in Rabbits Fed a Diet with Aztec Marigold Flower Extract
Source: Int J Mol Sci. 2022 Sep 11;23(18):10552. doi: 10.3390/ijms231810552 (PMC9506012; doi:10.3390/ijms231810552)
Supplement: Supplementary file 1 [file ijms-23-10552-s001.zip › supplement1.txt]

Relative RNA expression analysis


      gene   Diet.Genotype      mean        sd     lower     upper
1    GAPDH Control.ins/ins 11.518564 0.5509693 10.651317 12.389927
2    GAPDH Control.ins/kel 10.766001 0.5479067  9.847823 11.683674
3    GAPDH Control.kel/kel 11.732964 0.5586904 10.835381 12.663088
4  B.ACTIN Control.ins/ins 10.883226 0.4873269 10.060846 11.649331
5  B.ACTIN Control.ins/kel 10.660573 0.4751929  9.887969 11.448489
6  B.ACTIN Control.kel/kel 10.655395 0.4843356  9.866332 11.470170
7     LRAT Control.ins/ins  4.901354 0.4938983  4.106022  5.683392
8     LRAT Control.ins/kel  4.822577 0.5194253  3.975260  5.721342
9     LRAT Control.kel/kel  4.844886 0.4890447  4.032431  5.631760
10    BCO1 Control.ins/ins  4.426553 0.5655066  3.528086  5.359284
11    BCO1 Control.ins/kel  6.655549 0.5426107  5.761680  7.548415
12    BCO1 Control.kel/kel  5.367133 0.5640517  4.438686  6.285336
13    BCO2 Control.ins/ins  4.835701 0.6218412  3.783954  5.838693
14    BCO2 Control.ins/kel  4.765673 0.6871561  3.638253  5.862865
15    BCO2 Control.kel/kel  5.059913 0.6382124  4.009967  6.083291
16    TTPA Control.ins/ins  5.947071 0.6797749  4.748372  6.978325
17    TTPA Control.ins/kel  6.182575 0.6822557  5.108870  7.317471
18    TTPA Control.kel/kel  6.289862 0.6687330  5.225615  7.393419

$GAPDH
                 difference
pvalue            Control.ins/ins Control.ins/kel Control.kel/kel
  Control.ins/ins              NA      -0.7525631       0.2144003
  Control.ins/kel       0.3287414              NA       0.9669634
  Control.kel/kel       0.7782300       0.2129344              NA

$B.ACTIN
                 difference
pvalue            Control.ins/ins Control.ins/kel Control.kel/kel
  Control.ins/ins              NA      -0.2226526    -0.227831051
  Control.ins/kel       0.7474330              NA    -0.005178464
  Control.kel/kel       0.7286314       0.9941707              NA

$LRAT
                 difference
pvalue            Control.ins/ins Control.ins/kel Control.kel/kel
  Control.ins/ins              NA     -0.07877674     -0.05646806
  Control.ins/kel       0.9116249              NA      0.02230868
  Control.kel/kel       0.9346142      0.97527693              NA

$BCO1
                 difference
pvalue            Control.ins/ins Control.ins/kel Control.kel/kel
  Control.ins/ins              NA      2.22899613       0.9405801
  Control.ins/kel      0.00434713              NA      -1.2884160
  Control.kel/kel      0.22765632      0.09407984              NA

$BCO2
                 difference
pvalue            Control.ins/ins Control.ins/kel Control.kel/kel
  Control.ins/ins              NA     -0.07002756       0.2242121
  Control.ins/kel       0.9390777              NA       0.2942397
  Control.kel/kel       0.7967066      0.75569786              NA

$TTPA
                 difference
pvalue            Control.ins/ins Control.ins/kel Control.kel/kel
  Control.ins/ins              NA       0.2355046       0.3427912
  Control.ins/kel       0.8029261              NA       0.1072866
  Control.kel/kel       0.7157760       0.9098643              NA


      gene      Diet.Genotype      mean        sd     lower     upper
1    GAPDH Tagetes e..ins/ins 10.610733 0.5022393  9.789780 11.414631
2    GAPDH Tagetes e..ins/kel 10.793884 0.4997519  9.984536 11.607491
3    GAPDH Tagetes e..kel/kel 11.196081 0.5067037 10.382425 12.007024
4  B.ACTIN Tagetes e..ins/ins 11.356616 0.5579764 10.452906 12.274073
5  B.ACTIN Tagetes e..ins/kel 10.509672 0.5707642  9.555916 11.407233
6  B.ACTIN Tagetes e..kel/kel 10.610439 0.5676875  9.655850 11.519269
7     LRAT Tagetes e..ins/ins  4.695014 0.6606227  3.608541  5.805015
8     LRAT Tagetes e..ins/kel  4.125167 0.6741376  3.016340  5.208174
9     LRAT Tagetes e..kel/kel  4.785939 0.6714048  3.642171  5.857189
10    BCO1 Tagetes e..ins/ins  5.238625 0.6144424  4.231137  6.246167
11    BCO1 Tagetes e..ins/kel  6.243767 0.6111050  5.241460  7.284751
12    BCO1 Tagetes e..kel/kel  5.392212 0.5937701  4.450233  6.318882
13    BCO2 Tagetes e..ins/ins  5.280753 0.7348867  4.166724  6.535901
14    BCO2 Tagetes e..ins/kel  6.270372 0.7257978  5.080532  7.477557
15    BCO2 Tagetes e..kel/kel  7.371503 0.7115590  6.177729  8.576879
16    TTPA Tagetes e..ins/ins  6.033229 0.8145710  4.701308  7.384169
17    TTPA Tagetes e..ins/kel  5.497336 0.8513046  4.085036  6.900945
18    TTPA Tagetes e..kel/kel  7.058864 0.8076273  5.728478  8.437426

$GAPDH
                    difference
pvalue               Tagetes e..ins/ins Tagetes e..ins/kel Tagetes e..kel/kel
  Tagetes e..ins/ins                 NA          0.1831506          0.5853477
  Tagetes e..ins/kel          0.7951872                 NA          0.4021971
  Tagetes e..kel/kel          0.4082479          0.5742513                 NA

$B.ACTIN
                    difference
pvalue               Tagetes e..ins/ins Tagetes e..ins/kel Tagetes e..kel/kel
  Tagetes e..ins/ins                 NA         -0.8469438         -0.7461771
  Tagetes e..ins/kel          0.2912229                 NA          0.1007667
  Tagetes e..kel/kel          0.3536908          0.9003381                 NA

$LRAT
                    difference
pvalue               Tagetes e..ins/ins Tagetes e..ins/kel Tagetes e..kel/kel
  Tagetes e..ins/ins                 NA         -0.5698475         0.09092461
  Tagetes e..ins/kel          0.5545773                 NA         0.66077207
  Tagetes e..kel/kel          0.9218732          0.4822543                 NA

$BCO1
                    difference
pvalue               Tagetes e..ins/ins Tagetes e..ins/kel Tagetes e..kel/kel
  Tagetes e..ins/ins                 NA          1.0051423          0.1535873
  Tagetes e..ins/kel          0.2496442                 NA         -0.8515550
  Tagetes e..kel/kel          0.8560197          0.3183195                 NA

$BCO2
                    difference
pvalue               Tagetes e..ins/ins Tagetes e..ins/kel Tagetes e..kel/kel
  Tagetes e..ins/ins                 NA          0.9896193           2.090750
  Tagetes e..ins/kel         0.33948124                 NA           1.101131
  Tagetes e..kel/kel         0.04070125          0.2796628                 NA

$TTPA
                    difference
pvalue               Tagetes e..ins/ins Tagetes e..ins/kel Tagetes e..kel/kel
  Tagetes e..ins/ins                 NA         -0.5358927           1.025635
  Tagetes e..ins/kel          0.6539675                 NA           1.561528
  Tagetes e..kel/kel          0.3727115          0.1904957                 NA


      gene      Diet.Genotype      mean        sd     lower     upper
1    GAPDH    Control.ins/ins 11.498746 0.5935959 10.534675 12.502684
2    GAPDH Tagetes e..ins/ins 10.618806 0.6134950  9.631934 11.629360
3  B.ACTIN    Control.ins/ins 10.868828 0.6176215  9.836647 11.870642
4  B.ACTIN Tagetes e..ins/ins 11.362059 0.6044440 10.385798 12.333309
5     LRAT    Control.ins/ins  4.680431 0.8233455  3.363098  5.989852
6     LRAT Tagetes e..ins/ins  4.468678 0.8069386  3.157163  5.815195
7     BCO1    Control.ins/ins  4.373797 0.6792701  3.190609  5.463991
8     BCO1 Tagetes e..ins/ins  5.223163 0.6547014  4.150777  6.270968
9     BCO2    Control.ins/ins  4.804350 0.8164354  3.462983  6.208418
10    BCO2 Tagetes e..ins/ins  5.253306 0.8088422  3.892035  6.553639
11    TTPA    Control.ins/ins  5.616493 0.9404123  4.089555  7.221430
12    TTPA Tagetes e..ins/ins  6.004414 0.9283961  4.458382  7.545293

$GAPDH
                    difference
pvalue               Control.ins/ins Tagetes e..ins/ins
  Control.ins/ins                 NA         -0.8799392
  Tagetes e..ins/ins       0.3046953                 NA

$B.ACTIN
                    difference
pvalue               Control.ins/ins Tagetes e..ins/ins
  Control.ins/ins                 NA          0.4932311
  Tagetes e..ins/ins       0.5770795                 NA

$LRAT
                    difference
pvalue               Control.ins/ins Tagetes e..ins/ins
  Control.ins/ins                 NA         -0.2117532
  Tagetes e..ins/ins       0.8525912                 NA

$BCO1
                    difference
pvalue               Control.ins/ins Tagetes e..ins/ins
  Control.ins/ins                 NA          0.8493662
  Tagetes e..ins/ins       0.3875303                 NA

$BCO2
                    difference
pvalue               Control.ins/ins Tagetes e..ins/ins
  Control.ins/ins                 NA           0.448956
  Tagetes e..ins/ins       0.6915853                 NA

$TTPA
                    difference
pvalue               Control.ins/ins Tagetes e..ins/ins
  Control.ins/ins                 NA          0.3879213
  Tagetes e..ins/ins       0.7699781                 NA


      gene      Diet.Genotype      mean        sd    lower     upper
1    GAPDH    Control.ins/kel 10.758803 0.5005892 9.888881 11.543741
2    GAPDH Tagetes e..ins/kel 10.788502 0.5032780 9.971080 11.619711
3  B.ACTIN    Control.ins/kel 10.643768 0.5332101 9.796532 11.511096
4  B.ACTIN Tagetes e..ins/kel 10.523272 0.5177363 9.710385 11.366310
5     LRAT    Control.ins/kel  4.805779 0.5277143 3.913909  5.653680
6     LRAT Tagetes e..ins/kel  4.242406 0.5445808 3.336628  5.114932
7     BCO1    Control.ins/kel  6.637892 0.5547925 5.725104  7.521949
8     BCO1 Tagetes e..ins/kel  6.242247 0.5661537 5.319372  7.172921
9     BCO2    Control.ins/kel  4.724986 0.6803159 3.596675  5.812152
10    BCO2 Tagetes e..ins/kel  6.272518 0.6709437 5.208464  7.338482
11    TTPA    Control.ins/kel  6.106223 0.8055941 4.742724  7.366270
12    TTPA Tagetes e..ins/kel  5.476259 0.8121211 4.185778  6.893107

$GAPDH
                    difference
pvalue               Control.ins/kel Tagetes e..ins/kel
  Control.ins/kel                 NA         0.02969922
  Tagetes e..ins/kel       0.9663389                 NA

$B.ACTIN
                    difference
pvalue               Control.ins/kel Tagetes e..ins/kel
  Control.ins/kel                 NA         -0.1204965
  Tagetes e..ins/kel        0.872112                 NA

$LRAT
                    difference
pvalue               Control.ins/kel Tagetes e..ins/kel
  Control.ins/kel                 NA         -0.5633723
  Tagetes e..ins/kel       0.4493174                 NA

$BCO1
                    difference
pvalue               Control.ins/kel Tagetes e..ins/kel
  Control.ins/kel                 NA         -0.3956448
  Tagetes e..ins/kel       0.6173604                 NA

$BCO2
                    difference
pvalue               Control.ins/kel Tagetes e..ins/kel
  Control.ins/kel                 NA           1.547532
  Tagetes e..ins/kel       0.1098058                 NA

$TTPA
                    difference
pvalue               Control.ins/kel Tagetes e..ins/kel
  Control.ins/kel                 NA          -0.629964
  Tagetes e..ins/kel       0.5781153                 NA


      gene      Diet.Genotype      mean        sd     lower     upper
1    GAPDH    Control.kel/kel 11.742038 0.4190647 11.091072 12.436735
2    GAPDH Tagetes e..kel/kel 11.220048 0.4262616 10.533863 11.927009
3  B.ACTIN    Control.kel/kel 10.677855 0.3911811 10.023628 11.329563
4  B.ACTIN Tagetes e..kel/kel 10.598627 0.3874595  9.966686 11.221117
5     LRAT    Control.kel/kel  4.896917 0.4187876  4.231401  5.601458
6     LRAT Tagetes e..kel/kel  4.851106 0.3942323  4.175548  5.477815
7     BCO1    Control.kel/kel  5.383169 0.4832753  4.584637  6.150307
8     BCO1 Tagetes e..kel/kel  5.419634 0.5069814  4.607403  6.276392
9     BCO2    Control.kel/kel  5.171507 0.5241595  4.323192  6.025037
10    BCO2 Tagetes e..kel/kel  7.376988 0.5069480  6.550722  8.196515
11    TTPA    Control.kel/kel  6.327384 0.4805926  5.574145  7.085281
12    TTPA Tagetes e..kel/kel  7.095100 0.4765285  6.306641  7.905798

$GAPDH
                    difference
pvalue               Control.kel/kel Tagetes e..kel/kel
  Control.kel/kel                 NA         -0.5219896
  Tagetes e..kel/kel       0.3793264                 NA

$B.ACTIN
                    difference
pvalue               Control.kel/kel Tagetes e..kel/kel
  Control.kel/kel                 NA        -0.07922838
  Tagetes e..kel/kel       0.8878205                 NA

$LRAT
                    difference
pvalue               Control.kel/kel Tagetes e..kel/kel
  Control.kel/kel                 NA        -0.04581089
  Tagetes e..kel/kel       0.9363959                 NA

$BCO1
                    difference
pvalue               Control.kel/kel Tagetes e..kel/kel
  Control.kel/kel                 NA         0.03646545
  Tagetes e..kel/kel       0.9589798                 NA

$BCO2
                    difference
pvalue               Control.kel/kel Tagetes e..kel/kel
  Control.kel/kel                 NA           2.205481
  Tagetes e..kel/kel      0.00236828                 NA

$TTPA
                    difference
pvalue               Control.kel/kel Tagetes e..kel/kel
  Control.kel/kel                 NA          0.7677161
  Tagetes e..kel/kel       0.2655409                 NA
